# **Increasing HIV treatment literacy among people living with HIV using a novel health communication aid: Evidence from KwaZulu Natal province, South Africa**

**Authors:** Caroline Govathson<sup>1</sup>, Neo Ndlovu<sup>1</sup>, Letitia Rambally-Greener<sup>2</sup>, Laura Schmucker<sup>3</sup>, Candice Chetty-Makkan<sup>1</sup>, Jacqui Miot<sup>1</sup>, Harsha Thirumurthy<sup>3</sup>, Sophie Pascoe<sup>1</sup>, Shawn Malone<sup>2</sup>, Alison Bутtenheim<sup>4</sup>

## **Affiliations:**

<sup>1</sup> Health Economics and Epidemiology Research Office, Faculty of Health Sciences, University of the Witwatersrand, Johannesburg, South Africa

<sup>2</sup> Population Services International (PSI)

<sup>3</sup> Department of Medical Ethics and Health Policy, Perelman School of Medicine, University of Pennsylvania, Philadelphia, PA, USA

<sup>4</sup> Department of Family and Community Health, School of Nursing, University of Pennsylvania, Philadelphia, PA, USA

§ Corresponding author: Caroline Govathson; [cgovathson@heroza.org](mailto:cgovathson@heroza.org)

## 1 **Abstract**

2 **Introduction:** Effective health communication is important for promoting adherence to  
3 antiretroviral therapy (ART). During counselling sessions with people living with HIV (PLHIV)  
4 who are initiating or re-initiating ART, we assessed whether a simple visual aid using bead bottles  
5 to explain the concept of viral suppression resulted in changes in HIV treatment literacy.

6  
7 **Methods:** At three public sector clinics in KwaZulu-Natal (KZN) province, South Africa, we  
8 enrolled adults who tested HIV-positive and were newly initiating ART or re-engaging in HIV  
9 care. Trained HIV counsellors used bottles with coloured beads (“B-OK bottles”) to explain  
10 concepts related to viral load, viral suppression, and undetectable=Untransmittable (U=U). We  
11 assessed participants’ knowledge, attitudes, and perceptions about ART before and after  
12 counselling.

13  
14 **Results:** Between November 2022 and January 2023, we enrolled 80 PLHIV. Participants’ median  
15 age was 32 years (IQR: 24–41) and 58% were male. After receiving counselling with the B-OK  
16 bottles, understanding of U=U increased from 6% to 99% and understanding of ‘viral suppression’  
17 increased from 20% to 99%. Confidence in the protective effects of ART increased (64% to 100%  
18 for one’s own health; 58% to 94% for transmission to partners) and was observed among  
19 participants both initiating ART and re-engaging in care. The number of participants agreeing that  
20 viral suppression means their sexual partners are safe from HIV even without condoms increased  
21 from 14% to 93% p-value =0.0. However, 65% still expressed worry that ART does not completely  
22 eliminate the risk of sexually transmitting HIV.

23  
24 **Conclusions:** Use of B-OK bottles during ART counselling was acceptable and increased HIV  
25 treatment literacy. While there was no significant effect on level of confidence in complete  
26 elimination of transmission risk when virally suppressed, we observed a significant reduction in  
27 concern about transmitting HIV and an increase in confidence in the protective effects of ART.

28  
29 Clinical Trial Number (SANCTR): DOH-27-092022-8067

30

## 31 **Introduction**

32 Despite scientific evidence about the therapeutic and prevention benefits of antiretroviral therapy  
33 (ART), awareness of these benefits remains low in much of sub-Saharan Africa (SSA)(1,2). The  
34 prevention benefits of ART in particular have been substantially underestimated in multiple  
35 segments of the population, including people living with HIV (PLHIV) and healthcare providers  
36 (3,4). Several studies conducted in South Africa, which has the world's largest HIV epidemic,  
37 show that individuals have limited comprehension of the meaning of viral suppression and  
38 substantially underestimate the effects of ART on viral load and transmission risk (5,6).

39  
40 While increased treatment literacy has the potential to improve ART uptake and retention in care  
41 among PLHIV, few evaluations have been conducted on interventions that disseminate  
42 information about ART, including the message of "undetectable=untransmittable" (U=U). The  
43 most commonly evaluated interventions, including motivational interviewing, health promotion  
44 programs, group or individual recipient of care counselling, and active visualisation, have had  
45 varying results (7,8,9).

46  
47 Visual aids have the potential to convey health information in an accessible way to individuals  
48 with low numeracy or literacy; this can be particularly effective for facilitating discussions of  
49 complex numerical information, such as the percentage reduction in transmission risk due to ART.  
50 Visual aids allow for the use of narrative, metaphor, and analogy in HIV treatment adherence  
51 counselling (10,11) and can also help recalibrate flawed or outdated mental models about the  
52 effects of ART on HIV viral loads and transmission risk (12,13).

53  
54 The B-OK bead bottles (**Figure 1**) are a simple visual aid that is designed to assist healthcare  
55 workers improve HIV treatment literacy among care recipients. Developed by Population Services  
56 International (PSI) in collaboration with Matchboxology in South Africa in 2021, using a human-  
57 centred design process, the bottles are a conversation starter for nurses and counsellors, assisting  
58 them with communicating the importance of treatment adherence, the benefits of viral suppression,  
59 and the "good news" of U=U and treatment as prevention. This study examines changes in  
60 treatment literacy among PLHIV in South Africa who were introduced to the B-OK bottles during  
61 ART initiation or re-engagement in care.

62  
63  
64  
65  
66  
67  
68  
69  
70  
71  
72  
73  
74  
75  
76  
77  
78  
79  
80  
81  
82  
83  
84  
85  
86  
87  
88  
89  
90  
91  
92

## Methods

At three public sector clinics in KwaZulu-Natal, South Africa, we enrolled adults who tested HIV-positive and were newly initiating ART or were re-engaging in HIV care after a treatment interruption of at least 90 days. In addition to the standard post-test counselling that all clients receive at the clinics, trained HIV counsellors introduced the three bottles with coloured beads (B-OK bottles, Fig. 1) and used the bottles to explain the meaning of viral load, the effect of ART on viral suppression, and the reduction in transmission risk as a result of viral suppression (i.e., U=U).

Before and immediately after introducing the B-OK bottles, counsellors administered a brief survey that assessed participants' demographic characteristics and level of treatment literacy. Treatment literacy was measured using nine questions about the need for timely ART initiation, the effect of ART on viral load and the effect of viral suppression on transmission risk (Appendix 1). Participants' responses to the questions were assigned a score of 1 for correct responses, 0 for "not sure" responses, and -1 for incorrect responses. We then calculated a treatment literacy index score that was the sum of the scores from the 9 items, with a maximum value of 9. The survey also assessed participants' overall understanding of HIV treatment and their awareness of the concepts of "viral suppression" and "U=U".

We compared differences in treatment literacy index scores measured before and after exposure to the B-OK bottles using Wilcoxon sign-rank test. This statistical method was chosen due to the paired nature of the data and that the data was non-parametric as determined by a Shapiro-Wilk test. The study was approved by the research ethics committees at the University of the Witwatersrand # M220707 and University of Pennsylvania # 852087.

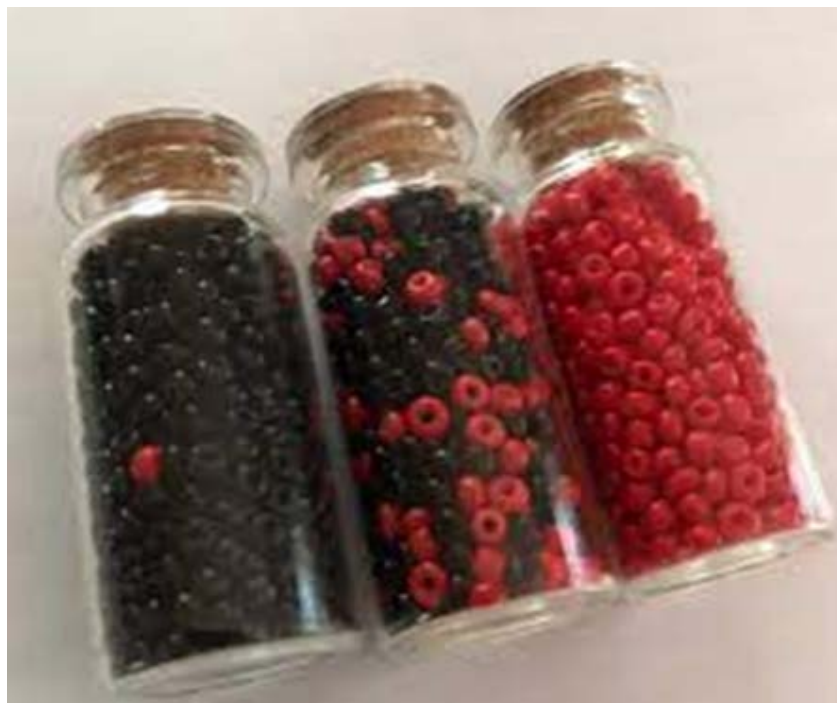

93

94 **Figure 1:** B-OK bead bottles

95

## 96 **Results**

97 Between November 14, 2022 and January 18, 2023, we screened 90 adult PLHIV at study clinics.  
98 Ten PLHIV were excluded due to age, ill health or refusal to participate. Among the 80  
99 participants who were enrolled, 23 were newly initiating ART and 55 were re-engaging in care  
100 after a treatment interruption of at least 90 days, 2 preferred not to tell us whether they were newly  
101 initiating ART or re-engaging with care after a treatment interruption. Median age was 32 years  
102 (IQR: 24–41), 46 (58%) were male, 20 (25%) were either married or in a relationship, and 63  
103 (79%) had completed primary school (**Table 1**).

104

105

106

107

108

109

110

111

112 **Table 1. Participant characteristics**

| Variable             | Categories     | All participants | Newly initiating ART | Unknown ART status** | Re-engagement* |
|----------------------|----------------|------------------|----------------------|----------------------|----------------|
| Age                  |                | 32 (24.0-41.5)   | 27 (23.0-32.0)       | 36 (32.0-40.0)       | 33 (28-42)     |
| Gender               | Male           | 46 (57.5%)       | 8 (34.8%)            | 0 (0.0%)             | 36 (65.5%)     |
|                      | Female         | 34 (42.5%)       | 15 (65.2%)           | 0 (0.0%)             | 19 (34.5%)     |
| Race                 | African        | 79 (78.8%)       | 23 (29.1%)           | 1 (50.0%)            | 55 (69.6%)     |
|                      | Indian         | 1 (1.3%)         | 0 (0.0%)             | 1 (50.0%)            | 0 (0.00%)      |
| Relationship status  | Single         | 60 (75.0%)       | 17 (73.9%)           | 1 (50.0%)            | 42 (76.4%)     |
|                      | Relationship   | 17 (21.2%)       | 6 (26.1%)            | 0 (0.0%)             | 11 (20.0%)     |
|                      | Married        | 3 (3.8%)         | 0 (0.0%)             | 1 (50.0%)            | 2 (3.6%)       |
| Education completed  | Primary school | 17 (21.3%)       | 4 (17.4%)            | 0 (0.0%)             | 13 (23.6%)     |
|                      | High school    | 61 (76.3%)       | 19 (82.6%)           | 1 (50.0%)            | 41 (74.6%)     |
|                      | Diploma/degree | 2 (2.5%)         | 0 (0.0%)             | 1 (50.0%)            | 1 (1.8%)       |
| Employment           | Employed       | 24 (30.0%)       | 9 (39.1%)            | 1 (50.0%)            | 14 (25.5%)     |
|                      | Self employed  | 6 (7.5%)         | 1 (4.4%)             | 0 (0.0%)             | 5 (9.1%)       |
|                      | In school      | 5 (6.3%)         | 1 (4.4%)             | 0 (0.0%)             | 4 (7.3%)       |
|                      | Unemployed     | 45 (56.3%)       | 15 (52.2%)           | 1 (50.0%)            | 32 (58.2%)     |
| Mobile phone         | No             | 7 (8.8%)         | 3 (13.0%)            | 0 (0.0%)             | 4 (7.3%)       |
|                      | Yes            | 73 (91.3%)       | 20 (87.0%)           | 2 (100.0%)           | 51 (92.7%)     |
| Time since diagnosis | < 6 months     | 25 (31.3%)       | 22 (95.7%)           | 0 (0.0%)             | 3 (5.5%)       |
|                      | >= 6 months    | 55 (68.8%)       | 1 (4.4%)             | 2 (100.0%)           | 52 (94.6%)     |

113 \*\*Unknown ART status: was not determined whether they were new initiates or had been on ART before

114 \*Re-engagement: re-engaging in care after a treatment interruption of at least 90 days

115

116 Exposure to the B-OK bottles led to a significant increase in treatment literacy among participants  
 117 **(Figure 2)**. Prior to being introduced to the B-OK bottles, the median treatment literacy index  
 118 score was 2 (IQR 0-3) out of 9. After being exposed to the B-OK bottles, treatment literacy was  
 119 significantly higher (median score 7, IQR 5-7,  $p < 0.001$ ). The largest increases in treatment literacy  
 120 were observed for questions about the effect of ART on improving one's own health (16% to 95%)  
 121 and on reducing transmission risk (14% to 94%). The only component of the literacy index that  
 122 did not change significantly was knowledge about the need for immediate ART initiation following  
 123 diagnosis (73% to 81%,  $p = 0.13$ ). The increase in treatment literacy following exposure to the B-  
 124 OK bottles was significant both among participants newly initiating ART and those re-engaging  
 125 in care; post-test scores in new initiates were higher compared to post-test scores for those re-  
 126 engaging with care although the median scores were the same (7: IQR 7-7 among new initiates vs

127 7: IQR 5 -7 among re-engaging;  $p < 0.001$ ) (Figure 2). Prior to the B-OK bottle discussion, 70% of  
128 participants agreed that they “worried that HIV treatment did not completely eliminate the risk of  
129 transmission”, 14% disagreed, and 17% were not sure. After the bead bottle discussion, 65% of  
130 participants still agreed with this statement, while the percentage of those who disagreed increased  
131 to 33% and only 3% remained unsure. Exposure to the B-OK bottles also led to a significant  
132 increase in whether participants had ever heard of the terms “viral suppression” and “U=U”, from  
133 20.0% to 98.8% and 8.75% to 98.8%, respectively (**Table A1**)  
134

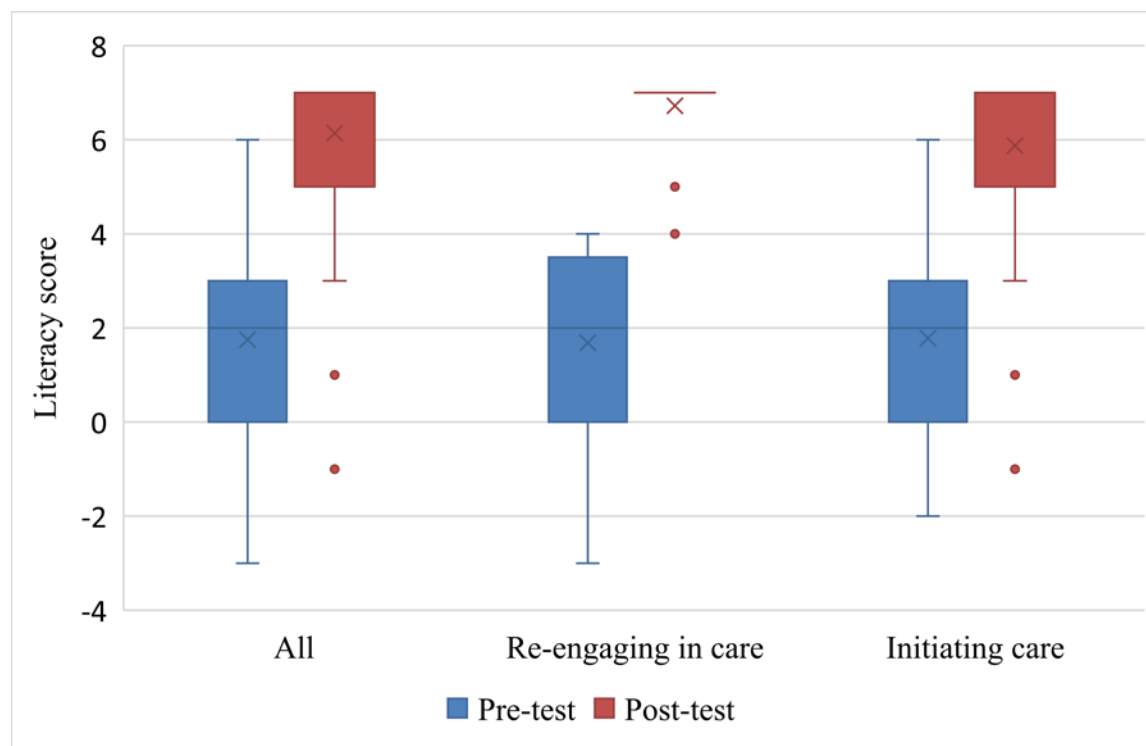

135  
136 **Figure 2.** HIV treatment literacy scores before and after B-OK bead bottle discussion, by treatment  
137 status (re-engaging in care after a treatment interruption of at least 90 days or initiating treatment)  
138

## 139 Discussion

140 Use of visual aids in the form of coloured bead bottles to provide education about HIV and ART  
141 led to a large increase in treatment literacy among PLHIV at selected clinics in KwaZulu-Natal,  
142 South Africa. Data collected prior to use of the B-OK bottles confirmed findings from other studies  
143 (1,6) with participants having low treatment literacy, including limited awareness of the

144 therapeutic and prevention benefits of ART. In contrast, following the short, 10-minute  
145 introduction to the B-OK bottles, care recipients reported much higher knowledge about the  
146 benefits of ART.

147  
148 This study contributes to a growing body of research on strategies for increasing treatment literacy  
149 among PLHIV and the general population. While relatively few studies have been conducted in  
150 Sub-Saharan Africa (8,9), the existing evidence shows that provision of information about U=U in  
151 the form of flyers and interpersonal communication as well as community meetings were  
152 successful in increasing HIV testing uptake and reducing stigma (3). To our knowledge, this is one  
153 of the first studies to examine changes in treatment literacy through the use of simple visual aids  
154 that explain the benefits of ART.

155  
156 Several studies have highlighted the difficulties in conveying the U=U message to PLHIV in a  
157 way that is easily understood (2,3,14). The B-OK bottles have the potential to remove some of  
158 these challenges. These bottles use visual aids, which have long been recognised as an effective  
159 way of communicating complex health information to, care recipients to explain concepts  
160 involving HIV in the body and the way that ART can reduce viral load and transmission risk. The  
161 bead bottles are also useful for explaining concepts involving probability. Enabling care recipients  
162 to engage with the bead bottles may have also facilitated their absorption of key health information  
163 relating to ART. Some advantages of the B-OK bottles include the low cost and ease with which  
164 they can be made and the short amount of time needed to use the bottles to explain HIV, ART and  
165 VLS. The bottles can also be used effectively by lay providers.

166  
167 This study has several limitations. First, because there was no control group, changes in treatment  
168 literacy following the use of B-OK bead bottles may be confounded by other factors. Additionally,  
169 we measured the change in treatment literacy immediately after explaining the B-OK bead bottles,  
170 which limits our ability to assess whether care recipients' increased treatment literacy was  
171 sustained over time and whether this impacted treatment uptake and adherence.

172  
173 **Conclusions**



174 This study shows that a simple visual aid that explains the effect of ART on HIV viral loads has  
175 the potential to improve awareness of the therapeutic and prevention benefits of ART among  
176 PLHIV. Future research should include rigorous, larger scale evaluations that determine the effect  
177 of the B-OK bottles and similar visual aids on not only treatment literacy, but also health  
178 behaviours and clinical outcomes among PLHIV. Implementation research that assesses strategies  
179 for introducing and adapting the B-OK bottles for large-scale use should also be a priority.

180

181

182 **Competing interests**

183 The authors declare that they have no competing interests.

184

185 **Authors' contributions**

186 HT, SP, AB, CCM and SM conceptualized and designed the study. CG conducted the analysis.

187 CG prepared the original draft. All authors reviewed and edited the draft.

188 **Author information**

189 We would like to thank the all the participants and staff including data capturers and nurses at the  
190 facilities we conducted the research for their support and contribution to the success of the study.

191

192 **Acknowledgements**

193 The authors gratefully acknowledge the contributions of the study participants and dedication of  
194 the staff at the study sites.

195

196 **Funding** [Optional]:

197 This analysis was funded by the Bill & Melinda Gates Foundation (INV-008318). The contents  
198 are the responsibility of the authors and do not necessarily reflect the views of the sponsor. The  
199 funders had no role in the study design, collection, analysis and interpretation of the data, in  
200 manuscript preparation or the decision to publish.

201

202 **Data Availability Statement** [Mandatory]

203 The dataset analysed for the manuscript is available upon reasonable request.

204 **Supporting Information** [Optional]

205 Supporting Information file 1:

1

2 **Table A1: Comparison of HIV Treatment Knowledge Pre and Post Use of BOK Bead Bottles**

| 3                                                                                                                  | Pre-test   |            |            | Post-test   |            |          | Exact Chi square |
|--------------------------------------------------------------------------------------------------------------------|------------|------------|------------|-------------|------------|----------|------------------|
|                                                                                                                    | Agree      | Disagree   | Not sure   | Agree       | Disagree   | Not sure | P-value          |
| Someone who tests positive for HIV does not need to start HIV treatment right away if they are still feeling fine. | 17 (21.3%) | 59 (73.8%) | 4 (5.0%)   | 15 (18.8%)  | 65 (81.3%) | 0 (0.0%) | 0.13             |
| If I am virally suppressed, my sexual partners are safe from HIV even if we don't use a condom.                    | 11 (13.8%) | 46 (57.5%) | 23 (28.8%) | 75 (93.8%)  | 5 (6.3%)   | 0 (0.0%) | <0.01            |
| Even if I am virally suppressed, I worry that there is still some risk of giving HIV to a sexual partner.          | 53 (66.3%) | 9 (11.3%)  | 18 (22.5%) | 52 (65.0%)  | 27 (33.8%) | 1 (1.3%) | <0.01            |
| If someone with HIV is virally suppressed, the HIV is under control and cannot harm them.                          | 13 (16.3%) | 37 (46.3%) | 30 (37.5%) | 76 (95.0%)  | (3.8%)     | 1 (1.3%) | <0.01            |
| Someone with HIV should take treatment to protect their sexual partners from getting it.                           | 51 (63.8%) | 17 (21.3%) | 12 (15.0%) | 80 (100.0%) | 0 (0.0%)   | 0 (0.0%) | <0.01            |
| I worry that HIV treatment does not completely eliminate the risk of passing HIV through sex.                      | 56 (70.0%) | 11 (13.8%) | 13 (16.3%) | 52 (65.0%)  | 26 (32.5%) | 3 (2.5%) | <0.01            |
| Having HIV doesn't mean I will eventually die from it                                                              | 69 (86.3%) | 8 (10.0%)  | 3 (3.8%)   | 76 (95.0%)  | 4 (5.0%)   | 0 (0.0%) | 0.08             |
| Once I'm virally suppressed, it means the HIV is gone and I can stop taking treatment.                             | 3 (3.8%)   | 69 (86.3%) | 8 (10.0%)  | 3 (3.8%)    | 77 (96.3%) | 0 (0.0%) | 0.01             |
| HIV treatment can get rid of almost all the HIV in the body.                                                       | 5 (6.3%)   | 58 (72.5%) | 17 (21.3%) | 6 (7.5%)    | 73 (91.3%) | 1 (1.3%) | <0.01            |
| It's fine to miss your HIV treatment some days, as long as you're taking it most of the time.                      | 13 (16.3%) | 62 (77.5%) | 5 (6.3%)   | 4 (5.0%)    | 76 (95.0%) | 0 (0.0%) | <0.01            |

## 1 References

- 2 1. Raberahona M, Lidamahasolo Z, Andriamamonjisoa J, Andriananja V, Andrianasolo RL,  
3 Rakotoarivelo RA, et al. Knowledge, attitudes, perception and practices regarding  
4 antiretroviral therapy among HIV-infected adults in Antananarivo, Madagascar: A cross-  
5 sectional survey. *BMC Health Serv Res* [Internet]. 2019 May 28 [cited 2023 Mar  
6 29];19(1):1–9. Available from:  
7 <https://bmchealthservres.biomedcentral.com/articles/10.1186/s12913-019-4173-3>
- 8 2. Gaps in U=U awareness globally: healthcare providers need to do more to get the message  
9 out | *aidsmap* [Internet]. [cited 2023 Mar 29]. Available from:  
10 [https://www.aidsmap.com/news/jul-2022/gaps-uu-awareness-globally-healthcare-](https://www.aidsmap.com/news/jul-2022/gaps-uu-awareness-globally-healthcare-providers-need-do-more-get-message-out)  
11 [providers-need-do-more-get-message-out](https://www.aidsmap.com/news/jul-2022/gaps-uu-awareness-globally-healthcare-providers-need-do-more-get-message-out)
- 12 3. Bor J, Fischer C, Modi M, Richman · Bruce, Kinker · Cameron, King R, et al. Changing  
13 Knowledge and Attitudes Towards HIV Treatment-as-Prevention and “Undetectable =  
14 Untransmittable”: A Systematic Review. *AIDS Behav* [Internet]. 2021 [cited 2023 Mar  
15 29];25:4209–24. Available from: <https://doi.org/10.1007/s10461-021-03296-8>
- 16 4. Ndyabakira A, Chamie G, Emperador D, Marson K, Kamya MR, Havlir D V., et al.  
17 Men’s Beliefs About the Likelihood of Serodiscordance in Couples with an HIV-Positive  
18 Partner: Survey Evidence from Rural Uganda. *AIDS Behav* [Internet]. 2020 Mar 1 [cited  
19 2023 Mar 29];24(3):967–74. Available from:  
20 <https://link.springer.com/article/10.1007/s10461-019-02531-7>
- 21 5. Mooney AC, Gottert A, Khoza N, Rebombo D, Hove J, Suárez AJ, et al. Men’s  
22 Perceptions of Treatment as Prevention in South Africa: Implications for Engagement in  
23 HIV Care and Treatment. <https://doi.org/10.1521/aeap2017293274> [Internet]. 2017 Jun 26  
24 [cited 2023 Mar 29];29(3):274–87. Available from:  
25 <https://guilfordjournals.com/doi/10.1521/aeap.2017.29.3.274>
- 26 6. Bor J, Musakwa N, Onoya D, Evans D. Perceived efficacy of HIV treatment-as-  
27 prevention among university students in Johannesburg, South Africa. *Sex Transm Infect.*  
28 2021 Dec 1;97(8):596–600.
- 29 7. Ridgeway K, Dulli LS, Murray KR, Silverstein H, Santo LD, Olsen P, et al. Interventions  
30 to improve antiretroviral therapy adherence among adolescents in low- and middle-income  
31 countries: A systematic review of the literature. *PLoS One* [Internet]. 2018 Jan 1 [cited  
32 2023 Mar 29];13(1):e0189770. Available from:  
33 <https://journals.plos.org/plosone/article?id=10.1371/journal.pone.0189770>

- 34 8. Damulak PP, Ismail S, Manaf RA, Said SM, Agbaji O. Interventions to improve  
35 adherence to antiretroviral therapy (Art) in sub-saharan africa: An updated systematic  
36 review. *Int J Environ Res Public Health*. 2021 Mar 1;18(5):1–18.
- 37 9. Jones ASK, Coetzee B, Kagee A, Fernandez J, Cleveland E, Thomas M, et al. The Use of  
38 a Brief, Active Visualisation Intervention to Improve Adherence to Antiretroviral Therapy  
39 in Non-adherent Patients in South Africa. *AIDS Behav* [Internet]. 2019 Aug 15 [cited  
40 2023 Mar 29];23(8):2121–9. Available from:  
41 <https://link.springer.com/article/10.1007/s10461-018-2292-1>
- 42 10. Newman S, Longworth DL, Stoller JK. Metaphorical medicine: using metaphors to  
43 enhance communication with patients who have pulmonary disease. *Ann Intern Med*  
44 [Internet]. 2002 Sep 3 [cited 2023 Apr 24];137(5 Part 1):376–9. Available from:  
45 <https://pubmed.ncbi.nlm.nih.gov/12204044/>
- 46 11. Casarett D, Pickard A, Fishman JM, Alexander SC, Arnold RM, Pollak KI, et al. Can  
47 metaphors and analogies improve communication with seriously ill patients? *J Palliat Med*  
48 [Internet]. 2010 Mar 1 [cited 2023 Apr 24];13(3):255–60. Available from:  
49 <https://pubmed.ncbi.nlm.nih.gov/19922170/>
- 50 12. Audet CM, Gutin SA, Blevins M, Chiau E, Alvim F, Jose E, et al. The Impact of Visual  
51 Aids and Enhanced Training on the Delivery of Positive Health, Dignity, and Prevention  
52 Messages to Adult Patients Living with HIV in Rural North Central Mozambique. *PLoS*  
53 *One* [Internet]. 2015 Jul 6 [cited 2023 Apr 24];10(7). Available from:  
54 </pmc/articles/PMC4493138/>
- 55 13. Mbanda N, Dada S, Bastable K, Ingalill GB, Ralf W. S. A scoping review of the use of  
56 visual aids in health education materials for persons with low-literacy levels. *Patient Educ*  
57 *Couns*. 2021 May 1;104(5):998–1017.
- 58 14. Grace D, Stewart M, Blaque E, Ryu H, Anand P, Gaspar M, et al. Challenges to  
59 communicating the Undetectable equals Untransmittable (U=U) HIV prevention message:  
60 Healthcare provider perspectives. *PLoS One* [Internet]. 2022 Jul 1 [cited 2023 Mar  
61 29];17(7 July). Available from: [https://www.aidsmap.com/news/jul-2022/gaps-uu-](https://www.aidsmap.com/news/jul-2022/gaps-uu-awareness-globally-healthcare-providers-need-do-more-get-message-out)  
62 [awareness-globally-healthcare-providers-need-do-more-get-message-out](https://www.aidsmap.com/news/jul-2022/gaps-uu-awareness-globally-healthcare-providers-need-do-more-get-message-out)

63

64
